# Supplementary material for: DBSCAN and GIE, Two Density-Based “Grid-Free” Methods for Finding Areas of Endemism: A Case Study of Flea Beetles (Coleoptera, Chrysomelidae) in the Afrotropical Region
Source: MDPI journal article supplement (doi:10.3390/insects12121115), 2021-12-13
Supplement: s1 [file s1]

## List of the sinendemisms in each AoE identified by the DBSCAN and GIE methods

### Density-based spatial clustering of applications with noise (DBSCAN)

100km (maximum diameter of distribution) 100km (maximum distance of centroids) 5syn (number of synendemisms)

#### Cluster WCP Western Cape Province 21

|                                      |                                       |
|--------------------------------------|---------------------------------------|
| <i>Adamastoraltica humicola</i>      | <i>Longitarsus hexrivierbergensis</i> |
| <i>Chaetocnema adamastori</i>        | <i>Longitarsus luctuosus</i>          |
| <i>Chaetocnema chalcea</i>           | <i>Longitarsus lugubris</i>           |
| <i>Chaetocnema saldanhai</i>         | <i>Longitarsus malherbei</i>          |
| <i>Chaetocnema sp n 1</i>            | <i>Longitarsus neseri</i>             |
| <i>Chaetocnema sp n 8</i>            | <i>Longitarsus piketbergensis</i>     |
| <i>Chaetocnema tablensis</i>         | <i>Longitarsus rouxi</i>              |
| <i>Chirodica cedarbergensis</i>      | <i>Stegnaspea audisiana</i>           |
| <i>Longitarsus afro meridionalis</i> | <i>Stegnaspea danielssoni</i>         |
| <i>Longitarsus cedarbergensis</i>    | <i>Stegnaspea penrithae</i>           |
| <i>Longitarsus debiasei</i>          |                                       |

#### Cluster KAR Katanga region 6

|                               |                                  |
|-------------------------------|----------------------------------|
| <i>Angulaphthona confusa</i>  | <i>Chaetocnema sp n 2</i>        |
| <i>Chaetocnema muya</i>       | <i>Chaetocnema sp n 3</i>        |
| <i>Chaetocnema reprehensa</i> | <i>Collartaltica nigrolucens</i> |

#### Cluster ANR Antananarivo region 10

|                                   |                                |
|-----------------------------------|--------------------------------|
| <i>Chabria betsimisaraka</i>      | <i>Neoder a difficilis</i>     |
| <i>Chabria bezanozana</i>         | <i>Neoder a diversitarsis</i>  |
| <i>Chaetocnema basipunctata</i>   | <i>Neoder a kraussi</i>        |
| <i>Chaetocnema cachani</i>        | <i>Neoder a pauliani0.....</i> |
| <i>Chaetocnema madascariensis</i> | <i>Neoder a straminea</i>      |

#### Cluster MP-LI Mpumalanga-Limpopo 11

|                                     |                                   |
|-------------------------------------|-----------------------------------|
| <i>Afroaltica parvula</i>           | <i>Serraphula alticola</i>        |
| <i>Chaetocnema mapumalangaensis</i> | <i>Serraphula grobbelaariae</i>   |
| <i>Chaetocnema sp n 4</i>           | <i>Serraphula mpumalangaensis</i> |
| <i>Chaetocnema sp n 7</i>           | <i>Serraphula transvaalensis</i>  |
| <i>Chaetocnema sp n 9</i>           | <i>Serraphula wittmeri</i>        |
| <i>Longitarsus transvaalensis</i>   |                                   |

#### Cluster DKM-KWN Drakensberg Mountains- KwaZulu-Natal 10

|                                     |                                    |
|-------------------------------------|------------------------------------|
| <i>Chaetocnema barkeri</i>          | <i>Serraphula audisiana</i>        |
| <i>Chaetocnema mariobiondii</i>     | <i>Serraphula colonnellii</i>      |
| <i>Chaetocnema sp n 5</i>           | <i>Serraphula drakensbergensis</i> |
| <i>Chaetocnema sp n 6</i>           | <i>Serraphula natalensis</i>       |
| <i>Drakensbergianella rudebecki</i> | <i>Serraphula osellai</i>          |

|             |                  |    |
|-------------|------------------|----|
| Cluster BER | Betsiboka region | 10 |
|-------------|------------------|----|

|                                    |                                            |
|------------------------------------|--------------------------------------------|
| <i>Diphaulacosoma crassicornis</i> | <i>Neodera reducta</i>                     |
| <i>Diphaulacosoma elegans</i>      | <i>Neodera sogai</i>                       |
| <i>Diphaulacosoma nigroscutis</i>  | <i>Neodera vadoni</i>                      |
| <i>Neodera longicollis</i>         | <i>Pseudophygasia ambohitsitondroensis</i> |
| <i>Neodera micheli</i>             | <i>Pseudophygasia apolinaria</i>           |

|             |                |   |
|-------------|----------------|---|
| Cluster AMM | Ambra Mountain | 5 |
|-------------|----------------|---|

|                               |                              |
|-------------------------------|------------------------------|
| <i>Diphaulacosoma bicolor</i> | <i>Neodera opaca</i>         |
| <i>Neodera bernieri</i>       | <i>Ntaolaltica antennata</i> |
| <i>Neodera breviantennata</i> |                              |
| <i>Neodera fulva</i>          |                              |

|                  |
|------------------|
| 300km 100km 5syn |
|------------------|

|             |                       |    |
|-------------|-----------------------|----|
| Cluster WCP | Western Cape Province | 32 |
|-------------|-----------------------|----|

|                                       |                                       |
|---------------------------------------|---------------------------------------|
| <i>Adamastoraltica humicola</i>       | <i>Longitarsus cedarbergensis</i>     |
| <i>Calotheca danielssoni</i>          | <i>Longitarsus debiasei</i>           |
| <i>Calotheca pallida</i>              | <i>Longitarsus hexrivierbergensis</i> |
| <i>Calotheca regularis</i>            | <i>Longitarsus luctuosus</i>          |
| <i>Chaetocnema adamastori</i>         | <i>Longitarsus lugubris</i>           |
| <i>Chaetocnema audisiana</i>          | <i>Longitarsus malherbei</i>          |
| <i>Chaetocnema chalcea</i>            | <i>Longitarsus melanicus</i>          |
| <i>Chaetocnema saldanhai</i>          | <i>Longitarsus neseri</i>             |
| <i>Chaetocnema sp n 1</i>             | <i>Longitarsus piketbergensis</i>     |
| <i>Chaetocnema sp n 8</i>             | <i>Longitarsus rouxi</i>              |
| <i>Chaetocnema tablensis</i>          | <i>Longitarsus sudafricanus</i>       |
| <i>Chirodica cedarbergensis</i>       | <i>Stegnaspea audisiana</i>           |
| <i>Chirodica chalcoptera unicolor</i> | <i>Stegnaspea danielssoni</i>         |
| <i>Chirodica outeniquensis</i>        | <i>Stegnaspea debiasei</i>            |
| <i>Longitarsus afromeridionalis</i>   | <i>Stegnaspea endroedyi</i>           |
| <i>Longitarsus capensis</i>           | <i>Stegnaspea penrithae</i>           |

|             |                |   |
|-------------|----------------|---|
| Cluster KAR | Katanga region | 6 |
|-------------|----------------|---|

|                               |                                  |
|-------------------------------|----------------------------------|
| <i>Angulaphthona confusa</i>  | <i>Chaetocnema sp n 2</i>        |
| <i>Chaetocnema muya</i>       | <i>Chaetocnema sp n 3</i>        |
| <i>Chaetocnema reprehensa</i> | <i>Collartaltica nigrolucens</i> |

|                 |                                      |    |
|-----------------|--------------------------------------|----|
| Cluster BER+ANR | Betsiboka region+Antananarivo region | 35 |
|-----------------|--------------------------------------|----|

|                                    |                              |
|------------------------------------|------------------------------|
| <i>Chabria betsimisaraka</i>       | <i>Neodera amplicollis</i>   |
| <i>Chabria bezanozana</i>          | <i>Neodera didiensis</i>     |
| <i>Chaetocnema basipunctata</i>    | <i>Neodera difficilis</i>    |
| <i>Chaetocnema cachani</i>         | <i>Neodera diversitarsis</i> |
| <i>Chaetocnema coronilla</i>       | <i>Neodera emarginata</i>    |
| <i>Chaetocnema madascariensis</i>  | <i>Neodera imitatrix</i>     |
| <i>Diphaulacosoma crassicornis</i> | <i>Neodera jenisi</i>        |
| <i>Diphaulacosoma elegans</i>      | <i>Neodera kraussi</i>       |
| <i>Diphaulacosoma jenisi</i>       | <i>Neodera longicollis</i>   |
| <i>Diphaulacosoma nigroscutis</i>  | <i>Neodera madagassa</i>     |

*Neodera marojejyensis*  
*Neodera micheli*  
*Neodera pauliani*  
*Neodera perroti*  
*Neodera peyrierasi*  
*Neodera picticornis*  
*Neodera reducta*  
*Neodera sogai*

*Neodera straminea*  
*Neodera straminoides*  
*Neodera vadoni*  
*Neodera varicornis*  
*Pseudophygasia ambohitsitondroensis*  
*Pseudophygasia apolinaria*  
*Pseudophygasia furax*

**Cluster DKM-KWN      Drakensberg Mountains-KwaZulu-Natal      13**

*Chaetocnema barkeri*  
*Chaetocnema longicornis*  
*Chaetocnema mariobiondii*  
*Chaetocnema sp n 5*  
*Chaetocnema sp n 6*  
*Chaetocnema turneri*  
*Chaetocnema zulu*

*Drakensbergianella rudebecki*  
*Serraphula audisiana*  
*Serraphula colonnellii*  
*Serraphula drakensbergensis*  
*Serraphula natalensis*  
*Serraphula osellai*

**Cluster MP-LI      Mpumalanga-Limpopo      11**

*Afroaltica parvula*  
*Chaetocnema mapumalangaensis*  
*Chaetocnema sp n 4*  
*Chaetocnema sp n 7*  
*Longitarsus transvaalensis*  
*Serraphula alticola*

*Serraphula duplessisi*  
*Serraphula grobbelaariae*  
*Serraphula mpumalangaensis*  
*Serraphula transvaalensis*  
*Serraphula wittmeri*

**Cluster AMM      Amber Mountain      6**

*Diphaulacosoma bicolor*  
*Neodera bernieri*  
*Neodera brevantennata*

*Neodera fulva*  
*Neodera opaca*  
*Ntaolaltica antennata*

**500km 100km 5syn**

**Cluster WCP      Western Cape Province      35**

*Adamastoraltica humicola*  
*Calotheca danielssoni*  
*Calotheca pallida*  
*Calotheca regularis*  
*Chaetocnema adamastori*  
*Chaetocnema audisiana*  
*Chaetocnema chalcea*  
*Chaetocnema convexicollis*  
*Chaetocnema saldanhai*  
*Chaetocnema sp n 1*  
*Chaetocnema sp n 8*  
*Chaetocnema tablensis*  
*Chirodica cedarbergensis*  
*Chirodica chalcopetra unicolor*  
*Chirodica fulvipes*  
*Chirodica outeniquensis*

*Chirodica similfulva*  
*Longitarsus afromeridionalis*  
*Longitarsus capensis*  
*Longitarsus cedarbergensis*  
*Longitarsus debiasei*  
*Longitarsus hexrivierbergensis*  
*Longitarsus luctuosus*  
*Longitarsus lugubris*  
*Longitarsus malherbei*  
*Longitarsus melanicus*  
*Longitarsus neseri*  
*Longitarsus piketbergensis*  
*Longitarsus rouxi*  
*Longitarsus sudafricanus*  
*Stegnaspea audisiana*  
*Stegnaspea danielssoni*

*Stegnaspea debiasei*  
*Stegnaspea endroedyi*

*Stegnaspea penrithae*

|             |                |   |
|-------------|----------------|---|
| Cluster KAR | Katanga region | 6 |
|-------------|----------------|---|

|                              |                                  |
|------------------------------|----------------------------------|
| <i>Angulaphthona confusa</i> | <i>Chaetocnema sp n 2</i>        |
| <i>Chaetocnema muya</i>      | <i>Chaetocnema sp n 3</i>        |
| <i>Chaetocnema prehensa</i>  | <i>Collartaltica nigrolucens</i> |

|                 |                                      |    |
|-----------------|--------------------------------------|----|
| Cluster BER+ANR | Betsiboka region+Antananarivo region | 40 |
|-----------------|--------------------------------------|----|

|                                    |                                            |
|------------------------------------|--------------------------------------------|
| <i>Chabria betsimisaraka</i>       | <i>Neodera madagassa</i>                   |
| <i>Chabria bezanozana</i>          | <i>Neodera marojejensis</i>                |
| <i>Chaetocnema basipunctata</i>    | <i>Neodera micheli</i>                     |
| <i>Chaetocnema cachani</i>         | <i>Neodera pauliani</i>                    |
| <i>Chaetocnema coronilla</i>       | <i>Neodera perroti</i>                     |
| <i>Chaetocnema madascariensis</i>  | <i>Neodera peyrierasi</i>                  |
| <i>Chaetocnema orophila</i>        | <i>Neodera picticornis</i>                 |
| <i>Diphaulacosoma crassicornis</i> | <i>Neodera reducta</i>                     |
| <i>Diphaulacosoma elegans</i>      | <i>Neodera similvadoni</i>                 |
| <i>Diphaulacosoma jeni</i>         | <i>Neodera sogai</i>                       |
| <i>Diphaulacosoma nigroscutis</i>  | <i>Neodera straminea</i>                   |
| <i>Neodera amplicollis</i>         | <i>Neodera straminoides</i>                |
| <i>Neodera didiensis</i>           | <i>Neodera transversicollis</i>            |
| <i>Neodera difficilis</i>          | <i>Neodera vadoni</i>                      |
| <i>Neodera diversitarsis</i>       | <i>Neodera varicornis</i>                  |
| <i>Neodera emarginata</i>          | <i>Pseudophygasia ambohitsitondroensis</i> |
| <i>Neodera imitatrix</i>           | <i>Pseudophygasia analis</i>               |
| <i>Neodera jeni</i>                | <i>Pseudophygasia apolinaria</i>           |
| <i>Neodera kraussi</i>             | <i>Pseudophygasia denotata</i>             |
| <i>Neodera longicollis</i>         | <i>Pseudophygasia furax</i>                |

|                 |                                     |    |
|-----------------|-------------------------------------|----|
| Cluster DKM-KWN | Drakensberg Mountains-KwaZulu-Natal | 16 |
|-----------------|-------------------------------------|----|

|                                 |                                     |
|---------------------------------|-------------------------------------|
| <i>Chaetocnema barkeri</i>      | <i>Chaetocnema zulu</i>             |
| <i>Chaetocnema brincki</i>      | <i>Drakensbergianella rudebecki</i> |
| <i>Chaetocnema longicornis</i>  | <i>Serraphula audisiana</i>         |
| <i>Chaetocnema mariobiondii</i> | <i>Serraphula colonnellii</i>       |
| <i>Chaetocnema sp n 5</i>       | <i>Serraphula drakensbergensis</i>  |
| <i>Chaetocnema sp n 6</i>       | <i>Serraphula monticola</i>         |
| <i>Chaetocnema sp n 12</i>      | <i>Serraphula natalensis</i>        |
| <i>Chaetocnema turneri</i>      | <i>Serraphula osellai</i>           |

|               |                    |    |
|---------------|--------------------|----|
| Cluster MP-LI | Mpumalanga-Limpopo | 11 |
|---------------|--------------------|----|

|                                    |                                   |
|------------------------------------|-----------------------------------|
| <i>Afroaltica parvula</i>          | <i>Serraphula alticola</i>        |
| <i>Chaetocnema mpumalangaensis</i> | <i>Serraphula duplessisi</i>      |
| <i>Chaetocnema sp n 4</i>          | <i>Serraphula grobbelaariae</i>   |
| <i>Chaetocnema sp n 7</i>          | <i>Serraphula mpumalangaensis</i> |
| <i>Chaetocnema sp n 9</i>          | <i>Serraphula wittmeri</i>        |
| <i>Longitarsus transvaalensis</i>  |                                   |

|             |                |   |
|-------------|----------------|---|
| Cluster AMM | Amber Mountain | 6 |
|-------------|----------------|---|

*Diphaulacosoma bicolor*  
*Neodera bernieri*  
*Neodera brevantennata*

*Neodera fulva*  
*Neodera opaca*  
*Ntaolaltica antennata*

100km 150km 5syn

Cluster WCP Western Cape Province 25

|                                       |                                       |
|---------------------------------------|---------------------------------------|
| <i>Adamastoraltica humicola</i>       | <i>Longitarsus hexrivierbergensis</i> |
| <i>Calotheca pallida</i>              | <i>Longitarsus luctuosus</i>          |
| <i>Chaetocnema adamastori</i>         | <i>Longitarsus lugubris</i>           |
| <i>Chaetocnema chalcea</i>            | <i>Longitarsus malherbei</i>          |
| <i>Chaetocnema saldanhai</i>          | <i>Longitarsus melanicus</i>          |
| <i>Chaetocnema sp n 1</i>             | <i>Longitarsus neseri</i>             |
| <i>Chaetocnema sp n 8</i>             | <i>Longitarsus piketbergensis</i>     |
| <i>Chaetocnema tablensis</i>          | <i>Longitarsus rouxi</i>              |
| <i>Chirodica cedarbergensis</i>       | <i>Stegnaspea audisiana</i>           |
| <i>Chirodica chalcopetra unicolor</i> | <i>Stegnaspea danielssoni</i>         |
| <i>Longitarsus afromeridionalis</i>   | <i>Stegnaspea endroedyi</i>           |
| <i>Longitarsus cedarbergensis</i>     | <i>Stegnaspea penrithae</i>           |
| <i>Longitarsus debiasei</i>           |                                       |

Cluster MP-LI Mpumalanga-Limpopo 14

|                                     |                                   |
|-------------------------------------|-----------------------------------|
| <i>Afroaltica parvula</i>           | <i>Longitarsus transvaalensis</i> |
| <i>Calotheca luteotessellata</i>    | <i>Serraphula alticola</i>        |
| <i>Chaetocnema mapumalangaensis</i> | <i>Serraphula duplessisi</i>      |
| <i>Chaetocnema sp n 4</i>           | <i>Serraphula grobbelaariae</i>   |
| <i>Chaetocnema sp n 7</i>           | <i>Serraphula mpumalangaensis</i> |
| <i>Chaetocnema sp n 9</i>           | <i>Serraphula transvaalensis</i>  |
| <i>Chaetocnema sp n 14</i>          | <i>Serraphula wittmeri</i>        |

Cluster KAR Katanga region 6

|                               |                                  |
|-------------------------------|----------------------------------|
| <i>Angulaphthona confusa</i>  | <i>Chaetocnema sp n 2</i>        |
| <i>Chaetocnema muya</i>       | <i>Chaetocnema sp n 3</i>        |
| <i>Chaetocnema reprehensa</i> | <i>Collartaltica nigrolucens</i> |

Cluster KIL Kilimandjaro region 8

|                                  |                             |
|----------------------------------|-----------------------------|
| <i>Blepharidina kasigauensis</i> | <i>Chaetocnema sp n 10</i>  |
| <i>Blepharidina macarthuri</i>   | <i>Chaetocnema sp n 11</i>  |
| <i>Blepharidina ornatcollis</i>  | <i>Psylliodes montana</i>   |
| <i>Calotheca jacybyi</i>         | <i>Psylliodes shirensis</i> |

Cluster BER+ANR Betsiboka region+Antananarivo region 25

|                                    |                                   |
|------------------------------------|-----------------------------------|
| <i>Chabria betsimisaraka</i>       | <i>Diphaulacosoma elegans</i>     |
| <i>Chabria bezanozana</i>          | <i>Diphaulacosoma nigroscutis</i> |
| <i>Chaetocnema basipunctata</i>    | <i>Neodera amplicollis</i>        |
| <i>Chaetocnema cachani</i>         | <i>Neodera difficilis</i>         |
| <i>Chaetocnema madascariensis</i>  | <i>Neodera diversitarsis</i>      |
| <i>Diphaulacosoma crassicornis</i> | <i>Neodera kraussi</i>            |

*Neodera longicollis*  
*Neodera madagassa*  
*Neodera marojejensis*  
*Neodera micheli*  
*Neodera pauliani*  
*Neodera perroti*  
*Neodera reducta*

*Neodera sogai*  
*Neodera straminea*  
*Neodera vadoni*  
*Pseudophygasia ambohitsitondroensis*  
*Pseudophygasia apolinaria*  
*Pseudophygasia furax*

|                 |                                       |    |
|-----------------|---------------------------------------|----|
| Cluster DKM-KWN | Drakensberg Mountains - KwaZulu-Natal | 13 |
|-----------------|---------------------------------------|----|

*Chaetocnema barkeri*  
*Chaetocnema mariobiondii*  
*Chaetocnema sp n 5*  
*Chaetocnema sp n 6*  
*Drakensbergianella rudebecki*  
*Jacobyana sudafricana*  
*Serraphula audisiana*

*Serraphula colonnellii*  
*Serraphula drakensbergensis*  
*Serraphula monticola*  
*Serraphula natalensis*  
*Serraphula osellai*  
*Serraphula puncticollis*

|             |                  |   |
|-------------|------------------|---|
| Cluster KLR | Kivu Lake region | 5 |
|-------------|------------------|---|

*Chaetocnema rutovuensis*  
*Chaetocnema varicornis*  
*Guilielmia monticola*

*Guilielmia leleupi*  
*Jacobyana centrafricana*

|             |                |   |
|-------------|----------------|---|
| Cluster AMM | Amber Mountain | 6 |
|-------------|----------------|---|

*Diphaulacosoma bicolor*  
*Neodera bernieri*  
*Neodera brevantennata*

*Neodera fulva*  
*Neodera opaca*  
*Ntaolaltica antennata*

|                  |
|------------------|
| 300km 150km 5syn |
|------------------|

|             |                       |    |
|-------------|-----------------------|----|
| Cluster WCP | Western Cape Province | 32 |
|-------------|-----------------------|----|

*Adamastoralta humicola*  
*Calotheca danielssoni*  
*Calotheca pallida*  
*Calotheca regularis*  
*Chaetocnema adamastori*  
*Chaetocnema audisiana*  
*Chaetocnema chalcona*  
*Chaetocnema saldanhai*  
*Chaetocnema sp n 1*  
*Chaetocnema sp n 8*  
*Chaetocnema tablensis*  
*Chirodica cedarbergensis*  
*Chirodica chalcona unicolor*  
*Chirodica outeniquensis*  
*Longitarsus afromeridionalis*  
*Longitarsus capensis*

*Longitarsus cedarbergensis*  
*Longitarsus debiasei*  
*Longitarsus hexrivierbergensis*  
*Longitarsus luctuosus*  
*Longitarsus lugubris*  
*Longitarsus malherbei*  
*Longitarsus melanicus*  
*Longitarsus neseri*  
*Longitarsus piketbergensis*  
*Longitarsus rouxi*  
*Longitarsus sudafricanus*  
*Stegnaspea audisiana*  
*Stegnaspea danielssoni*  
*Stegnaspea debiasei*  
*Stegnaspea endroedyi*  
*Stegnaspea penrithae*

|               |                    |    |
|---------------|--------------------|----|
| Cluster MP-LI | Mpumalanga-Limpopo | 14 |
|---------------|--------------------|----|

*Afroaltica parvula*

*Calotheca luteotessellata*

*Chaetocnema mapumalangaensis*  
*Chaetocnema sp n 4*  
*Chaetocnema sp n 7*  
*Chaetocnema sp n 9*  
*Chaetocnema sp n 14*  
*Longitarsus transvaalensis*

*Serraphula alticola*  
*Serraphula duplessisi*  
*Serraphula grobbelaariae*  
*Serraphula mpumalangaensis*  
*Serraphula transvaalensis*  
*Serraphula wittmeri*

|             |                |   |
|-------------|----------------|---|
| Cluster KAR | Katanga region | 6 |
|-------------|----------------|---|

*Angulaphthona confusa*  
*Chaetocnema muya*  
*Chaetocnema reprehensa*

*Chaetocnema sp n 2*  
*Chaetocnema sp n 3*  
*Collartaltica nigrolucens*

|             |                     |    |
|-------------|---------------------|----|
| Cluster KIL | Kilimandjaro region | 11 |
|-------------|---------------------|----|

*Blepharidina kasigauensis*  
*Blepharidina keniana*  
*Blepharidina macarthuri*  
*Blepharidina ornaticollis*  
*Blepharidina regolini*  
*Calotheca jacybyi*

*Chaetocnema sp n 10*  
*Chaetocnema sp n 11*  
*Collartaltica alluadi*  
*Psylliodes montana*  
*Psylliodes shirensis*

|                 |                                      |    |
|-----------------|--------------------------------------|----|
| Cluster BER+ANR | Betsiboka region+Antananarivo region | 35 |
|-----------------|--------------------------------------|----|

*Chabria betsimisaraka*  
*Chabria bezanozana*  
*Chaetocnema basipunctata*  
*Chaetocnema cachani*  
*Chaetocnema coronilla*  
*Chaetocnema madascariensis*  
*Diphaulacosoma crassicornis*  
*Diphaulacosoma elegans*  
*Diphaulacosoma jensi*  
*Diphaulacosoma nigroscutis*  
*Neodera amplicollis*  
*Neodera didiensis*  
*Neodera difficilis*  
*Neodera diversitarsis*  
*Neodera emarginata*  
*Neodera imitatrix*  
*Neodera jensi*  
*Neodera kraussi*

*Neodera longicollis*  
*Neodera madagassa*  
*Neodera marojejensis*  
*Neodera micheli*  
*Neodera pauliani*  
*Neodera perroti*  
*Neodera peyrierasi*  
*Neodera picticornis*  
*Neodera reducta*  
*Neodera sogai*  
*Neodera straminea*  
*Neodera straminoides*  
*Neodera vadoni*  
*Neodera varicornis*  
*Pseudophygasia ambohitsitondroensis*  
*Pseudophygasia apolinaria*  
*Pseudophygasia furax*

|                  |                                      |    |
|------------------|--------------------------------------|----|
| Cluster DEK- KWN | Drakensberg Mountains- KwaZulu-Natal | 17 |
|------------------|--------------------------------------|----|

*Chaetocnema barkeri*  
*Chaetocnema longicornis*  
*Chaetocnema mariobiondii*  
*Chaetocnema sp n 5*  
*Chaetocnema sp n 6*  
*Chaetocnema turneri*  
*Chaetocnema zulu*  
*Drakensbergianella rudebecki*

*Jacobyana sudafricana*  
*Longitarsus grobbelaariae*  
*Serraphula audisiana*  
*Serraphula colonnelli*  
*Serraphula drakensbergensis*  
*Serraphula monticola*  
*Serraphula natalensis*  
*Serraphula osellai*

*Serraphula puncticollis*

|             |                  |   |
|-------------|------------------|---|
| Cluster KLR | Kivu Lake region | 5 |
|-------------|------------------|---|

|                                |                                |
|--------------------------------|--------------------------------|
| <i>Chaetocnema rutovuensis</i> | <i>Guilielmia monticola</i>    |
| <i>Chaetocnema varicornis</i>  | <i>Jacobyana centrafricana</i> |
| <i>Guilielmia leleupi</i>      |                                |

|             |                |   |
|-------------|----------------|---|
| Cluster AMM | Amber Mountain | 6 |
|-------------|----------------|---|

|                                |                              |
|--------------------------------|------------------------------|
| <i>Diphaulacosoma bicolor</i>  | <i>Neodera fulva</i>         |
| <i>Neodera bernieri</i>        | <i>Neodera opaca</i>         |
| <i>Neodera brevi antennata</i> | <i>Ntaolaltica antennata</i> |

500km 150km 5syn

|             |                       |    |
|-------------|-----------------------|----|
| Cluster WCP | Western Cape Province | 35 |
|-------------|-----------------------|----|

|                                       |                                       |
|---------------------------------------|---------------------------------------|
| <i>Adamastoralta humicola</i>         | <i>Longitarsus capensis</i>           |
| <i>Calotheca danielssoni</i>          | <i>Longitarsus cedarbergensis</i>     |
| <i>Calotheca pallida</i>              | <i>Longitarsus debiasei</i>           |
| <i>Calotheca regularis</i>            | <i>Longitarsus hexrivierbergensis</i> |
| <i>Chaetocnema adamastori</i>         | <i>Longitarsus luctuosus</i>          |
| <i>Chaetocnema audisiana</i>          | <i>Longitarsus lugubris</i>           |
| <i>Chaetocnema chalcea</i>            | <i>Longitarsus malherbei</i>          |
| <i>Chaetocnema convexicollis</i>      | <i>Longitarsus melanicus</i>          |
| <i>Chaetocnema saldanhai</i>          | <i>Longitarsus neseri</i>             |
| <i>Chaetocnema sp n 1</i>             | <i>Longitarsus piketbergensis</i>     |
| <i>Chaetocnema sp n 8</i>             | <i>Longitarsus rouxi</i>              |
| <i>Chaetocnema tablensis</i>          | <i>Longitarsus sudafricanus</i>       |
| <i>Chirodica cedarbergensis</i>       | <i>Stegnaspea audisiana</i>           |
| <i>Chirodica chalcopetra unicolor</i> | <i>Stegnaspea danielssoni</i>         |
| <i>Chirodica fulvipes</i>             | <i>Stegnaspea debiasei</i>            |
| <i>Chirodica outeniquensis</i>        | <i>Stegnaspea endroedyi</i>           |
| <i>Chirodica similfulva</i>           | <i>Stegnaspea penrithae</i>           |
| <i>Longitarsus afromeridionalis</i>   |                                       |

|                        |                                                         |    |
|------------------------|---------------------------------------------------------|----|
| Cluster MP-LI+DKM- KWN | Mpumalanga-Limpopo+Drakensberg Mountains- KwaZulu-Natal | 38 |
|------------------------|---------------------------------------------------------|----|

|                                       |                                     |
|---------------------------------------|-------------------------------------|
| <i>Afroaltica parvula</i>             | <i>Chaetocnema sp n 9</i>           |
| <i>Calotheca carolineae</i>           | <i>Chaetocnema sp n 12</i>          |
| <i>Calotheca luteotessellata</i>      | <i>Chaetocnema sp n 14</i>          |
| <i>Calotheca wanati</i>               | <i>Chaetocnema zulu</i>             |
| <i>Chaetocnema barkeri</i>            | <i>Drakensbergianella rudebecki</i> |
| <i>Chaetocnema brincki</i>            | <i>Jacobyana sudafricana</i>        |
| <i>Chaetocnema frereensis</i>         | <i>Longitarsus grobbelaariae</i>    |
| <i>Chaetocnema longicornis</i>        | <i>Longitarsus transvaalensis</i>   |
| <i>Chaetocnema mapumalangaensis</i>   | <i>Serraphula alticola</i>          |
| <i>Chaetocnema mariobiondii</i>       | <i>Serraphula audisiana</i>         |
| <i>Chaetocnema phuthaditjhabensis</i> | <i>Serraphula burlischi</i>         |
| <i>Chaetocnema sp n 4</i>             | <i>Serraphula colonnellii</i>       |
| <i>Chaetocnema sp n 5</i>             | <i>Serraphula drakensbergensis</i>  |
| <i>Chaetocnema sp n 6</i>             | <i>Serraphula duplessisi</i>        |
| <i>Chaetocnema sp n 7</i>             | <i>Serraphula grobbelaariae</i>     |



*Serraphula monticola*  
*Serraphula mpumalangaensis*  
*Serraphula natalensis*  
*Serraphula osellai*

*Serraphula puncticollis*  
*Serraphula transvaalensis*  
*Serraphula uysi*  
*Serraphula wittmeri*

|             |                |   |
|-------------|----------------|---|
| Cluster KAR | Katanga region | 6 |
|-------------|----------------|---|

*Angulaphthona confusa*  
*Chaetocnema muya*  
*Chaetocnema reprehensa*

*Chaetocnema sp n 2*  
*Chaetocnema sp n 3*  
*Collartaltica nigrolucens*

|             |                     |    |
|-------------|---------------------|----|
| Cluster KIL | Kilimandjaro region | 17 |
|-------------|---------------------|----|

*Blepharidina kasigauensis*  
*Blepharidina kenya*  
*Blepharidina knighti*  
*Blepharidina macarthuri*  
*Blepharidina ornatcollis*  
*Blepharidina regali*  
*Blepharidina scripta*  
*Calotheca jacobyi*  
*Calotheca sjostedti*

*Chaetocnema sp n 10*  
*Chaetocnema sp n 11*  
*Collartaltica alluadi*  
*Psylliodes afromontana*  
*Psylliodes kikuyana*  
*Psylliodes manobioides*  
*Psylliodes montana*  
*Psylliodes shirensis*

|                 |                                      |    |
|-----------------|--------------------------------------|----|
| Cluster BER+ANR | Betsiboka region+Antananarivo region | 40 |
|-----------------|--------------------------------------|----|

*Chabria betsimisaraka*  
*Chabria bezanozana*  
*Chaetocnema basipunctata*  
*Chaetocnema cachani*  
*Chaetocnema coronilla*  
*Chaetocnema madascariensis*  
*Chaetocnema orophila*  
*Diphaulacosoma crassicornis*  
*Diphaulacosoma elegans*  
*Diphaulacosoma jensi*  
*Diphaulacosoma nigroscutis*  
*Neodera amplicollis*  
*Neodera didiensis*  
*Neodera difficilis*  
*Neodera diversitarsis*  
*Neodera emarginata*  
*Neodera imitatrix*  
*Neodera jensi*  
*Neodera kraussi*  
*Neodera longicollis*

*Neodera madagassa*  
*Neodera marojejensis*  
*Neodera micheli*  
*Neodera pauliani*  
*Neodera perroti*  
*Neodera peyrierasi*  
*Neodera picticornis*  
*Neodera reducta*  
*Neodera similvadoni*  
*Neodera sogai*  
*Neodera straminea*  
*Neodera straminoides*  
*Neodera transversicollis*  
*Neodera vadoni*  
*Neodera varicornis*  
*Pseudophygasia ambohitsitondroensis*  
*Pseudophygasia analis*  
*Pseudophygasia apolinaria*  
*Pseudophygasia denotata*  
*Pseudophygasia furax*

|             |                  |   |
|-------------|------------------|---|
| Cluster KLR | Kivu Lake region | 6 |
|-------------|------------------|---|

*Chaetocnema impressicollis*  
*Chaetocnema rutovuensis*  
*Chaetocnema varicornis*

*Guilielmia leleupi*  
*Guilielmia monticola*  
*Jacobyana centrafricana*

|             |                |   |
|-------------|----------------|---|
| Cluster AMM | Amber Mountain | 6 |
|-------------|----------------|---|

*Diphaulacosoma bicolor*  
*Neodera bernieri*  
*Neodera brevantennata*

*Neodera fulva*  
*Neodera opaca*  
*Ntaolaltica antennata*

100km 200km 5syn

Cluster WCP Western Cape Province 25

*Adamastoraltica humicola*  
*Calotheca pallida*  
*Chaetocnema adamastori*  
*Chaetocnema chalcona*  
*Chaetocnema saldanhai*  
*Chaetocnema sp n 1*  
*Chaetocnema sp n 8*  
*Chaetocnema tablensis*  
*Chirodica cedarbergensis*  
*Chirodica chalcopetra unicolor*  
*Longitarsus afromeridionalis*  
*Longitarsus cedarbergensis*  
*Longitarsus debiasei*

*Longitarsus hexrivierbergensis*  
*Longitarsus luctuosus*  
*Longitarsus lugubris*  
*Longitarsus malherbei*  
*Longitarsus melanicus*  
*Longitarsus neseri*  
*Longitarsus piketbergensis*  
*Longitarsus rouxi*  
*Stegnaspea audisiana*  
*Stegnaspea danielssoni*  
*Stegnaspea endroedyi*  
*Stegnaspea penrithae*

Cluster MP-LI+DKM- KWN Mpumalanga-Limpopo+Drakensberg Mountains- KwaZulu-Natal 34

*Afroaltica parvula*  
*Calotheca carolineae*  
*Calotheca luteotessellata*  
*Calotheca wanati*  
*Chaetocnema barkeri*  
*Chaetocnema mapumalangaensis*  
*Chaetocnema mariobiondii*  
*Chaetocnema sp n 4*  
*Chaetocnema sp n 5*  
*Chaetocnema sp n 6*  
*Chaetocnema sp n 7*  
*Chaetocnema sp n 9*  
*Chaetocnema sp n 14*  
*Chaetocnema sudafricana*  
*Drakensbergianella rudebecki*  
*Jacobyana sudafricana*  
*Longitarsus grobbelaariae*

*Longitarsus transvaalensis*  
*Serraphula alticola*  
*Serraphula audisiana*  
*Serraphula burlischi*  
*Serraphula colonnellii*  
*Serraphula debiasei*  
*Serraphula drakensbergensis*  
*Serraphula duplessisi*  
*Serraphula grobbelaariae*  
*Serraphula monticola*  
*Serraphula mpumalangaensis*  
*Serraphula natalensis*  
*Serraphula osellai*  
*Serraphula puncticollis*  
*Serraphula transvaalensis*  
*Serraphula uysi*  
*Serraphula wittmeri*

Cluster KAR Katanga region 7

*Angulaphthona confuse*  
*Chaetocnema kapiensis*  
*Chaetocnema muya*  
*Chaetocnema reprehensa*

*Chaetocnema sp n 2*  
*Chaetocnema sp n 3*  
*Collartaltica nigrolucens*

Cluster KIL Kilimandjaro region 9

*Blepharidina kasigauensis*  
*Blepharidina knighti*

*Blepharidina macarthuri*  
*Calotheca jacobyi*

*Calotheca ornaticollis*  
*Chaetocnema* sp n 11  
*Chaetocnema* sp n 15

*Psylliodes montana*  
*Psylliodes shirensis*

**Cluster BER+ANR      Betsiboka region+Antananarivo region      25**

|                                    |                                            |
|------------------------------------|--------------------------------------------|
| <i>Chabria betsimisaraka</i>       | <i>Neodera madagassa</i>                   |
| <i>Chabria bezanozana</i>          | <i>Neodera marojejensis</i>                |
| <i>Chaetocnema basipunctata</i>    | <i>Neodera micheli</i>                     |
| <i>Chaetocnema cachani</i>         | <i>Neodera pauliani</i>                    |
| <i>Chaetocnema madascariensis</i>  | <i>Neodera perroti</i>                     |
| <i>Diphaulacosoma crassicornis</i> | <i>Neodera reducta</i>                     |
| <i>Diphaulacosoma elegans</i>      | <i>Neodera sogai</i>                       |
| <i>Diphaulacosoma nigroscutis</i>  | <i>Neodera straminea</i>                   |
| <i>Neodera amplicollis</i>         | <i>Neodera vadoni</i>                      |
| <i>Neodera difficilis</i>          | <i>Pseudophygasia ambohitsitondroensis</i> |
| <i>Neodera diversitarsis</i>       | <i>Pseudophygasia apolinaria</i>           |
| <i>Neodera kraussi</i>             | <i>Pseudophygasia furax</i>                |
| <i>Neodera longicollis</i>         |                                            |

**Cluster KLR      Kivu Lake region      5**

|                                |                                |
|--------------------------------|--------------------------------|
| <i>Chaetocnema rutovuensis</i> | <i>Guilielmia monticola</i>    |
| <i>Chaetocnema varicornis</i>  | <i>Jacobyana centrafricana</i> |
| <i>Guilielmia leleupi</i>      |                                |

**Cluster AMM      Amber Mountain      6**

|                               |                              |
|-------------------------------|------------------------------|
| <i>Diphaulacosoma bicolor</i> | <i>Neodera fulva</i>         |
| <i>Neodera bernieri</i>       | <i>Neodera opaca</i>         |
| <i>Neodera brevantennata</i>  | <i>Ntaolaltica antennata</i> |

**300km 200km 5syn**

**Cluster WCP      Western Cape Province      32**

|                                     |                                       |
|-------------------------------------|---------------------------------------|
| <i>Adamastoraltica humicola</i>     | <i>Longitarsus cedarbergensis</i>     |
| <i>Calotheca danielssoni</i>        | <i>Longitarsus debiasei</i>           |
| <i>Calotheca pallida</i>            | <i>Longitarsus hexrivierbergensis</i> |
| <i>Calotheca regularis</i>          | <i>Longitarsus luctuosus</i>          |
| <i>Chaetocnema adamastori</i>       | <i>Longitarsus lugubris</i>           |
| <i>Chaetocnema audisiana</i>        | <i>Longitarsus malherbei</i>          |
| <i>Chaetocnema chalcona</i>         | <i>Longitarsus melanicus</i>          |
| <i>Chaetocnema saldanhai</i>        | <i>Longitarsus neseri</i>             |
| <i>Chaetocnema</i> sp n 1           | <i>Longitarsus piketbergensis</i>     |
| <i>Chaetocnema</i> sp n 8           | <i>Longitarsus rouxi</i>              |
| <i>Chaetocnema tablensis</i>        | <i>Longitarsus sudafricanus</i>       |
| <i>Chirodica cedarbergensis</i>     | <i>Stegnaspea audisiana</i>           |
| <i>Chirodica chalcona unicolor</i>  | <i>Stegnaspea danielssoni</i>         |
| <i>Chirodica outeniquensis</i>      | <i>Stegnaspea debiasei</i>            |
| <i>Longitarsus afromeridionalis</i> | <i>Stegnaspea endroedyi</i>           |
| <i>Longitarsus capensis</i>         | <i>Stegnaspea penrithae</i>           |

**Cluster MP-LI+DKM- KWN      Mpumalanga-Limpopo+Drakensberg Mountains- KwaZulu-Natal      37**

*Afroaltica parvula*  
*Calotheca carolineae*  
*Calotheca luteotessellata*  
*Calotheca wanati*  
*Chaetocnema barkeri*  
*Chaetocnema longicornis*  
*Chaetocnema mapumalangaensis*  
*Chaetocnema mariobiondii*  
*Chaetocnema sp n 4*  
*Chaetocnema sp n 5*  
*Chaetocnema sp n 6*  
*Chaetocnema sp n 7*  
*Chaetocnema sp n 9*  
*Chaetocnema sp n 14*  
*Chaetocnema sudafricana*  
*Chaetocnema turneri*  
*Chaetocnema zulu*  
*Drakensbergianella rudebecki*  
*Jacobyana sudafricana*

*Longitarsus grobbelaariae*  
*Longitarsus transvaalensis*  
*Serraphula alticola*  
*Serraphula audisiana*  
*Serraphula burlischi*  
*Serraphula colonnellii*  
*Serraphula debiasei*  
*Serraphula drakensbergensis*  
*Serraphula duplessisi*  
*Serraphula grobbelaariae*  
*Serraphula monticola*  
*Serraphula mpumalangaensis*  
*Serraphula natalensis*  
*Serraphula osellai*  
*Serraphula puncticollis*  
*Serraphula transvaalensis*  
*Serraphula uysi*  
*Serraphula wittmeri*

|             |                |   |
|-------------|----------------|---|
| Cluster KAR | Katanga region | 7 |
|-------------|----------------|---|

*Angulaphthona confusa*  
*Chaetocnema kapirensis*  
*Chaetocnema muya*  
*Chaetocnema reprehensa*

*Chaetocnema sp n 2*  
*Chaetocnema sp n 3*  
*Collartaltica nigrolucens*

|             |                     |    |
|-------------|---------------------|----|
| Cluster KIL | Kilimandjaro region | 15 |
|-------------|---------------------|----|

*Blepharidina kasigauensis*  
*Blepharidina kenya*  
*Blepharidina knighti*  
*Blepharidina macarthuri*  
*Blepharidina ornatocollis*  
*Blepharidina regali*  
*Calotheca jacobyi*  
*Chaetocnema sp n 11*

*Chaetocnema sp n 15*  
*Collartaltica alluadi*  
*Psylliodes afromontana*  
*Psylliodes kikuyana*  
*Psylliodes manobioides*  
*Psylliodes montana*  
*Psylliodes shirensis*

|                 |                                      |    |
|-----------------|--------------------------------------|----|
| Cluster BER+ANR | Betsiboka region+Antananarivo region | 35 |
|-----------------|--------------------------------------|----|

*Chabria betsimisaraka*  
*Chabria bezanozana*  
*Chaetocnema basipunctata*  
*Chaetocnema cachani*  
*Chaetocnema coronilla*  
*Chaetocnema madascariensis*  
*Diphaulacosoma crassicornis*  
*Diphaulacosoma elegans*  
*Diphaulacosoma jenseni*  
*Diphaulacosoma nigroscutis*  
*Neodera amplicollis*  
*Neodera didiensis*

*Neodera difficilis*  
*Neodera diversitarsis*  
*Neodera emarginata*  
*Neodera imitatrix*  
*Neodera jenseni*  
*Neodera kraussi*  
*Neodera longicollis*  
*Neodera madagassa*  
*Nisotra maiojeiensis*  
*Neodera micheli*  
*Neodera pauliani*  
*Neodera perroti*

*Neodera peyrrierasi*  
*Neodera picticornis*  
*Neodera reducta*  
*Neodera sogai*  
*Neodera straminea*  
*Neodera straminoides*

*Neodera vadoni*  
*Neodera varicornis*  
*Pseudophygasia ambohitsitondroensis*  
*Pseudophygasia apolinaria*  
*Pseudophygasia furax*

|             |                  |   |
|-------------|------------------|---|
| Cluster KLR | Kivu Lake region | 7 |
|-------------|------------------|---|

*Chaetocnema impressicollis*  
*Chaetocnema rutovuensis*  
*Chaetocnema vanschuytbroeckii*  
*Chaetocnema varicornis*

*Guilielmia leleupi*  
*Guilielmia monticola*  
*Jacobyana centrafricana*

|             |                |   |
|-------------|----------------|---|
| Cluster AMM | Amber Mountain | 6 |
|-------------|----------------|---|

*Diphaulacosoma bicolor*  
*Neodera bernieri*  
*Neodera brevantennata*

*Neodera fulva*  
*Neodera opaca*  
*Ntaolaltica antennata*

500km 200km 5syn

|             |                       |    |
|-------------|-----------------------|----|
| Cluster WCP | Western Cape Province | 35 |
|-------------|-----------------------|----|

*Adamastoraltica humicola*  
*Calotheca danielssoni*  
*Calotheca pallida*  
*Calotheca regularis*  
*Chaetocnema adamastori*  
*Chaetocnema audisiana*  
*Chaetocnema chalcea*  
*Chaetocnema convexiticollis*  
*Chaetocnema saldanhai*  
*Chaetocnema sp n 1*  
*Chaetocnema sp n 8*  
*Chaetocnema tablensis*  
*Chirodica cedarbergensis*  
*Chirodica chalcopetra unicolor*  
*Chirodica fulvipes*  
*Chirodica outeniquensis*  
*Chirodica similfulva*  
*Longitarsus afromeridionalis*

*Longitarsus capensis*  
*Longitarsus cedarbergensis*  
*Longitarsus debiasei*  
*Longitarsus hexrivierbergensis*  
*Longitarsus luctuosus*  
*Longitarsus lugubris*  
*Longitarsus malherbei*  
*Longitarsus melanicus*  
*Longitarsus neseri*  
*Longitarsus piketbergensis*  
*Longitarsus rouxi*  
*Longitarsus sudafricanus*  
*Stegnaspea audisiana*  
*Stegnaspea danielssoni*  
*Stegnaspea debiasei*  
*Stegnaspea endroedyi*  
*Stegnaspea penrithae*

|                        |                                                         |    |
|------------------------|---------------------------------------------------------|----|
| Cluster MP-LI+DKM- KWN | Mpumalanga-Limpopo+Drakensberg Mountains- KwaZulu-Natal | 41 |
|------------------------|---------------------------------------------------------|----|

*Afroaltica parvula*  
*Calotheca carolineae*  
*Calotheca luteotessellata*  
*Calotheca wanati*  
*Chaetocnema barkeri*  
*Chaetocnema brincki*  
*Chaetocnema freereensis*  
*Chaetocnema longicornis*  
*Chaetocnema mapumalangaensis*

*Chaetocnema mariobiondii*  
*Chaetocnema phuthaditjhabensis*  
*Chaetocnema sp n 4*  
*Chaetocnema sp n 5*  
*Chaetocnema sp n 6*  
*Chaetocnema sp n 7*  
*Chaetocnema sp n 9*  
*Chaetocnema sp n 12*  
*Chaetocnema sp n 14*

*Chaetocnema sudafricana*  
*Chaetocnema turneri*  
*Chaetocnema zulu*  
*Drakensbergianella rudebecki*  
*Jacobyana sudafricana*  
*Longitarsus grobbelaariae*  
*Longitarsus transvaalensis*  
*Serraphula alticola*  
*Serraphula audisiana*  
*Serraphula burlischi*  
*Serraphula colonnellii*  
*Serraphula debiasei*

*Serraphula drakensbergensis*  
*Serraphula duplessisi*  
*Serraphula grobbelaariae*  
*Serraphula monticola*  
*Serraphula mpumalangaensis*  
*Serraphula natalensis*  
*Serraphula osellai*  
*Serraphula puncticollis*  
*Serraphula transvaalensis*  
*Serraphula uysi*  
*Serraphula wittmeri*

|             |                |   |
|-------------|----------------|---|
| Cluster KAR | Katanga region | 7 |
|-------------|----------------|---|

*Angulaphthona confusa*  
*Chaetocnema kapirensis*  
*Chaetocnema muya*  
*Chaetocnema reprehensa*

*Chaetocnema sp n 2*  
*Chaetocnema sp n 3*  
*Collartaltica nigrolucens*

|             |                     |    |
|-------------|---------------------|----|
| Cluster KIL | Kilimandjaro region | 17 |
|-------------|---------------------|----|

*Blepharidina kasigauensis*  
*Blepharidina kenya*  
*Blepharidina knighti*  
*Blepharidina macarthuri*  
*Blepharidina ornatocollis*  
*Blepharidina regali*  
*Blepharidina scripta*  
*Calotheca jacobyi*  
*Calotheca sjostedti*

*Chaetocnema sp n 10*  
*Chaetocnema sp n 11*  
*Collartaltica alluadi*  
*Psylliodes afromontana*  
*Psylliodes kikuyana*  
*Psylliodes manobioides*  
*Psylliodes montana*  
*Psylliodes shirensis*

|                 |                                      |    |
|-----------------|--------------------------------------|----|
| Cluster BER+ANR | Betsiboka region+Antananarivo region | 40 |
|-----------------|--------------------------------------|----|

*Chabria betsimisaraka*  
*Chabria bezanozana*  
*Chaetocnema basipunctata*  
*Chaetocnema cachani*  
*Chaetocnema coronilla*  
*Chaetocnema madascariensis*  
*Chaetocnema orophila*  
*Diphaulacosoma crassicornis*  
*Diphaulacosoma elegans*  
*Diphaulacosoma jensi*  
*Diphaulacosoma nigroscutis*  
*Neodera amplicollis*  
*Neodera didiensis*  
*Neodera difficilis*  
*Neodera diversitarsis*  
*Neodera emarginata*  
*Neodera imitatrix*  
*Neodera jensi*  
*Neodera kraussi*

*Neodera longicollis*  
*Neodera madagassa*  
*Neodera marojejensis*  
*Neodera micheli*  
*Neodera pauliani*  
*Neodera perroti*  
*Neodera peyrierasi*  
*Neodera picticornis*  
*Neodera reducta*  
*Neodera similvadoni*  
*Neodera sogai*  
*Neodera straminea*  
*Neodera straminoides*  
*Neodera transversicollis*  
*Neodera vadoni*  
*Neodera varicornis*  
*Pseudophygasia ambohitsitondroensis*  
*Pseudophygasia analis*  
*Pseudophygasia apolinaria*

*Pseudophygasia denotata*

*Pseudophygasia furax*

|             |                  |   |
|-------------|------------------|---|
| Cluster KLR | Kivu Lake region | 7 |
|-------------|------------------|---|

*Chaetocnema impressicollis*

*Chaetocnema rutovuensis*

*Chaetocnema vanshuytbroeckii*

*Chaetocnema varicornis*

*Guilielmia leleupi*

*Guilielmia monticola*

*Jacobyana centrafricana*

|             |                |   |
|-------------|----------------|---|
| Cluster AMM | Amber Mountain | 6 |
|-------------|----------------|---|

*Diphaulacosoma bicolor*

*Neodera bernieri*

*Neodera brevantennata*

*Neodera fulva*

*Neodera opaca*

*Ntaolaltica antennata*

## Geographical Interpolation of Endemism

### Class 1: 100 km (Maximum distance between centroids)

#### KAR Katanga region 6

|                                       |                                          |
|---------------------------------------|------------------------------------------|
| 28, " <i>Angulaphthona confusa</i> "  | 28, " <i>Chaetocnema</i> sp n 2"         |
| 28, " <i>Chaetocnema muya</i> "       | 28, " <i>Chaetocnema</i> sp n 3"         |
| 28, " <i>Chaetocnema reprehensa</i> " | 28, " <i>Collartaltica nigrolucens</i> " |

#### AMM Amber Mountain 6

|                                       |                                      |
|---------------------------------------|--------------------------------------|
| 32, " <i>Diphaulacosoma bicolor</i> " | 32, " <i>Neodera fulva</i> "         |
| 32, " <i>Neodera bernieri</i> "       | 32, " <i>Neodera opaca</i> "         |
| 32, " <i>Neodera breviantennata</i> " | 32, " <i>Ntaolaltica antennata</i> " |

#### BER+ANR Betsiboka region-Antananarivo region 28

|                                            |                                          |
|--------------------------------------------|------------------------------------------|
| 33, " <i>Chabria betsimisaraka</i> "       | 33, " <i>Neodera longicollis</i> "       |
| 33, " <i>Chabria bezanozana</i> "          | 33, " <i>Neodera madagassa</i> "         |
| 33, " <i>Chaetocnema basipunctata</i> "    | 33, " <i>Neodera marojejyensis</i> "     |
| 33, " <i>Chaetocnema cachani</i> "         | 33, " <i>Neodera micheli</i> "           |
| 33, " <i>Chaetocnema coronilla</i> "       | 33, " <i>Neodera pauliani</i> "          |
| 33, " <i>Chaetocnema madascariensis</i> "  | 33, " <i>Neodera reducta</i> "           |
| 33, " <i>Diphaulacosoma crassicornis</i> " | 33, " <i>Neodera similvadoni</i> "       |
| 33, " <i>Diphaulacosoma elegans</i> "      | 33, " <i>Neodera sogai</i> "             |
| 33, " <i>Diphaulacosoma nigroscutis</i> "  | 33, " <i>Neodera straminea</i> "         |
| 33, " <i>Neodera amplicollis</i> "         | 33, " <i>Neodera straminoides</i> "      |
| 33, " <i>Neodera difficilis</i> "          | 33, " <i>Neodera vadoni</i> "            |
| 33, " <i>Neodera diversitarsis</i> "       | 33, " <i>Neodera varicornis</i> "        |
| 33, " <i>Neodera jenisi</i> "              | 33, " <i>Pseudophygasia apolinaria</i> " |
| 33, " <i>Neodera kraussi</i> "             | 33, " <i>Pseudophygasia furax</i> "      |

#### MP-LI+DKM-KWN Mpumalanga-Limpopo 13

|                                             |                                           |
|---------------------------------------------|-------------------------------------------|
| 47, " <i>Afroaltica parvula</i> "           | 47, " <i>Serraphula alticola</i> "        |
| 47, " <i>Calotheca luteotessellata</i> "    | 47, " <i>Serraphula duplessisi</i> "      |
| 47, " <i>Chaetocnema mapumalangaensis</i> " | 47, " <i>Serraphula grobbelaariae</i> "   |
| 47, " <i>Chaetocnema</i> sp n 4"            | 47, " <i>Serraphula mpumalangaensis</i> " |
| 47, " <i>Chaetocnema</i> sp n 7"            | 47, " <i>Serraphula transvaalensis</i> "  |
| 47, " <i>Chaetocnema</i> sp n 9"            | 47, " <i>Serraphula wittmeri</i> "        |
| 47, " <i>Longitarsus transvaalensis</i> "   |                                           |

#### WCP Western Cape Province 20

|                                             |                                               |
|---------------------------------------------|-----------------------------------------------|
| 61, " <i>Adamastoralta humicola</i> "       | 61, " <i>Longitarsus cedarbergensis</i> "     |
| 61, " <i>Chaetocnema adamastori</i> "       | 61, " <i>Longitarsus debiasei</i> "           |
| 61, " <i>Chaetocnema audisiana</i> "        | 61, " <i>Longitarsus hexrivierbergensis</i> " |
| 61, " <i>Chaetocnema saldanhai</i> "        | 61, " <i>Longitarsus luctuosus</i> "          |
| 61, " <i>Chaetocnema</i> sp n 1             | 61, " <i>Longitarsus malherbei</i> "          |
| 61, " <i>Chaetocnema tablensis</i> "        | 61, " <i>Longitarsus neseri</i> "             |
| 61, " <i>Chirodica cedarbergensis</i> "     | 61, " <i>Longitarsus piketbergensis</i> "     |
| 61, " <i>Longitarsus afromeridionalis</i> " | 61, " <i>Longitarsus rouxi</i> "              |
| 61, " <i>Longitarsus capensis</i> "         | 61, " <i>Stegnaspea audisiana</i> "           |



61, "*Stegnaspea danielssoni*"

61, "*Stegnaspea penrithae*"

**Class 2: 150 km**

**KLR Kivu Lake region 5**

20, "*Chaetocnema rutovuensis*"

20, "*Chaetocnema varicornis*"

20, "*Guilielmia leleupi*"

20, "*Guilielmia monticola*"

20, "*Jacobyana centrafricana*"

**KAR Katanga region 6**

29, "*Angulaphthona confusa*"

29, "*Chaetocnema muya*"

29, "*Chaetocnema reprehensa*"

29, "*Chaetocnema sp n 2*"

29, "*Chaetocnema sp n 3*"

29, "*Collartaltica nigrolucens*"

**AMM Amber Mountain 6**

33, "*Diphaulacosoma bicolor*"

33, "*Neodera bernieri*"

33, "*Neodera breviantennata*"

33, "*Neodera fulva*"

33, "*Neodera opaca*"

33, "*Ntaolaltica antennata*"

**BER+ANR Betsiboka region-Antananarivo region 35**

35, "*Chabria betsimisaraka*"

35, "*Chabria bezanozana*"

35, "*Chaetocnema basipunctata*"

35, "*Chaetocnema cachani*"

35, "*Chaetocnema coronilla*"

35, "*Chaetocnema madascariensis*"

35, "*Diphaulacosoma crassicornis*"

35, "*Diphaulacosoma elegans*"

35, "*Diphaulacosoma jenisi*"

35, "*Diphaulacosoma nigroscutis*"

35, "*Neodera amplicolis*"

35, "*Neodera didiensis*"

35, "*Neodera difficilis*"

35, "*Neodera diversitarsis*"

35, "*Neodera emarginata*"

35, "*Neodera imitatrix*"

35, "*Neodera jenisi*"

35, "*Neodera kraussi*"

35, "*Neodera longicollis*"

35, "*Neodera madagassa*"

35, "*Neodera marojejyensis*"

35, "*Neodera micheli*"

35, "*Neodera pauliani*"

35, "*Neodera perroti*"

35, "*Neodera picticornis*"

35, "*Neodera reducta*"

35, "*Neodera similvadoni*"

35, "*Neodera sogai*"

35, "*Neodera straminea*"

35, "*Neodera straminoides*"

35, "*Neodera vadoni*"

35, "*Neodera varicornis*"

35, "*Pseudophygasia ambohitsitondroensis*"

35, "*Pseudophygasia apolinaria*"

35, "*Pseudophygasia furax*"

**MP-LI Mpumalanga-Limpopo 13**

48, "*Afroaltica parvula*"

48, "*Calotheca luteotessellata*"

48, "*Chaetocnema mapumalangaensis*"

48, "*Chaetocnema sp n 4*"

48, "*Chaetocnema sp n 7*"

48, "*Chaetocnema sp n 9*"

48, "*Longitarsus transvaalensis*"

48, "*Serraphula alticola*"

48, "*Serraphula duplessisi*"

48, "*Serraphula grobbelaariae*"

48, "*Serraphula mpumalangaensis*"

48, "*Serraphula transvaalensis*"

48, "*Serraphula wittmeri*"

**DKM-KWN Drakensberg Mountains-KwaZulu Natal 17**

52, "*Chaetocnema barkeri*"  
 52, "*Chaetocnema longicornis*"  
 52, "*Chaetocnema mariobiondii*"  
 52, "*Chaetocnema sp n 5*"  
 52, "*Chaetocnema sp n 6*"  
 52, "*Chaetocnema zulu*"  
 52, "*Drakensbergianella rudebecki*"  
 52, "*Jacobyana sudafricana*"  
 52, "*Longitarsus grobbelaariae*"

52, "*Serraphula audisiana*"  
 52, "*Serraphula burlischi*"  
 52, "*Serraphula colonnelli*"  
 52, "*Serraphula drakensbergensis*"  
 52, "*Serraphula monticola*"  
 52, "*Serraphula natalensis*"  
 52, "*Serraphula osellai*"  
 52, "*Serraphula puncticollis*"

**WCP Western Cape Province 31**

56, "*Adamastoraltica humicola*"  
 56, "*Calotheca danielssoni*"  
 56, "*Calotheca regularis*"  
 56, "*Chaetocnema adamastori*"  
 56, "*Chaetocnema audisiana*"  
 56, "*Chaetocnema chalcea*"  
 56, "*Chaetocnema convexicollis*"  
 56, "*Chaetocnema saldanhai*"  
 56, "*Chaetocnema sp n 1*"  
 56, "*Chaetocnema tablensis*"  
 56, "*Chirodica cedarbergensis*"  
 56, "*Chirodica chalcopetra unicolor*"  
 56, "*Chirodica fulvipes*"  
 56, "*Chirodica similfulva*"  
 56, "*Longitarsus afromeridionalis*"  
 56, "*Longitarsus capensis*"

56, "*Longitarsus cedarbergensis*"  
 56, "*Longitarsus debiasei*"  
 56, "*Longitarsus hexrivierbergensis*"  
 56, "*Longitarsus luctuosus*"  
 56, "*Longitarsus lugubris*"  
 56, "*Longitarsus malherbei*"  
 56, "*Longitarsus melanicus*"  
 56, "*Longitarsus neseri*"  
 56, "*Longitarsus piketbergensis*"  
 56, "*Longitarsus rouxi*"  
 56, "*Longitarsus sudafricanus*"  
 56, "*Stegnaspea audisiana*"  
 56, "*Stegnaspea danielssoni*"  
 56, "*Stegnaspea endroedyi*"  
 56, "*Stegnaspea penrithae*"

**Class 3 : 200 km**

**KIL Kilimandjaro region 12**

18, "*Blepharidina kasigauensis*"  
 18, "*Blepharidina knighti*"  
 18, "*Blepharidina macarthuri*"  
 18, "*Blepharidina ornaticollis*"  
 18, "*Calotheca jacobyi*"  
 18, "*Chaetocnema sp n 10*"

18, "*Chaetocnema sp n 11*"  
 18, "*Collartaltica alluadi*"  
 18, "*Psylliodes afromontana*"  
 18, "*Psylliodes manobioides*"  
 18, "*Psylliodes montana*"  
 18, "*Psylliodes shirensis*"

**KLR Kivu Lake region 5**

19, "*Chaetocnema rutovuensis*"  
 19, "*Chaetocnema varicornis*"  
 19, "*Guilielmia leleupi*"

19, "*Guilielmia monticola*"  
 19, "*Jacobyana centrafricana*"

**KAR Katanga region 7**

28, "*Angulaphthona confusa*"  
 28, "*Chaetocnema kapirensis*"  
 28, "*Chaetocnema muya*"  
 28, "*Chaetocnema reprehensa*"

28, "*Chaetocnema sp n 2*"  
 28, "*Chaetocnema sp n 3*"  
 28, "*Collartaltica nigrolucens*"

|                                            |                                                    |
|--------------------------------------------|----------------------------------------------------|
| 31, " <i>Chabria betsilea</i> "            | 31, " <i>Neodera longicollis</i> "                 |
| 31, " <i>Chabria betsimisaraka</i> "       | 31, " <i>Neodera madagassa</i> "                   |
| 31, " <i>Chabria bezanozana</i> "          | 31, " <i>Neodera marojejensis</i> "                |
| 31, " <i>Chaetocnema basipunctata</i> "    | 31, " <i>Neodera micheli</i> "                     |
| 31, " <i>Chaetocnema cachani</i> "         | 31, " <i>Neodera nigrotibialis</i> "               |
| 31, " <i>Chaetocnema coronilla</i> "       | 31, " <i>Neodera opaca</i> "                       |
| 31, " <i>Chaetocnema madascariensis</i> "  | 31, " <i>Neodera pauliani</i> "                    |
| 31, " <i>Chaetocnema orophila</i> "        | 31, " <i>Neodera perroti</i> "                     |
| 31, " <i>Chaetocnema picipes</i> "         | 31, " <i>Neodera peyrierasi</i> "                  |
| 31, " <i>Diphaulacosoma bicolor</i> "      | 31, " <i>Neodera picticornis</i> "                 |
| 31, " <i>Diphaulacosoma bicolor</i> "      | 31, " <i>Neodera reducta</i> "                     |
| 31, " <i>Diphaulacosoma crassicornis</i> " | 31, " <i>Neodera similvadoni</i> "                 |
| 31, " <i>Diphaulacosoma elegans</i> "      | 31, " <i>Neodera sogai</i> "                       |
| 31, " <i>Diphaulacosoma jenisi</i> "       | 31, " <i>Neodera straminea</i> "                   |
| 31, " <i>Diphaulacosoma nigroscutis</i> "  | 31, " <i>Neodera straminoides</i> "                |
| 31, " <i>Neodera amplicolis</i> "          | 31, " <i>Neodera transversicollis</i> "            |
| 31, " <i>Neodera bernieri</i> "            | 31, " <i>Neodera vadoni</i> "                      |
| 31, " <i>Neodera breviantennata</i> "      | 31, " <i>Neodera varicornis</i> "                  |
| 31, " <i>Neodera didiensis</i> "           | 31, " <i>Ntaolaltica antennata</i> "               |
| 31, " <i>Neodera difficilis</i> "          | 31, " <i>Pseudophygasia ambohitsitondroensis</i> " |
| 31, " <i>Neodera diversitarsis</i> "       | 31, " <i>Pseudophygasia analis</i> "               |
| 31, " <i>Neodera emarginata</i> "          | 31, " <i>Pseudophygasia apolinaria</i> "           |
| 31, " <i>Neodera fulva</i> "               | 31, " <i>Pseudophygasia denotata</i> "             |
| 31, " <i>Neodera imitatrix</i> "           | 31, " <i>Pseudophygasia freyi</i> "                |
| 31, " <i>Neodera jenisi</i> "              | 31, " <i>Pseudophygasia furax</i> "                |
| 31, " <i>Neodera kraussi</i> "             |                                                    |

MP-LI Mpumalanga-Limpopo 14

|                                             |                                           |
|---------------------------------------------|-------------------------------------------|
| 42, " <i>Afroaltica parvula</i> "           | 42, " <i>Serraphula alticola</i> "        |
| 42, " <i>Calotheca luteotessellata</i> "    | 42, " <i>Serraphula duplessisi</i> "      |
| 42, " <i>Chaetocnema mapumalangaensis</i> " | 42, " <i>Serraphula grobbelaariae</i> "   |
| 42, " <i>Chaetocnema sp n 14</i> "          | 42, " <i>Serraphula mpumalangaensis</i> " |
| 42, " <i>Chaetocnema sp n 4</i> "           | 42, " <i>Serraphula transvaalensis</i> "  |
| 42, " <i>Chaetocnema sp n 7</i> "           | 42, " <i>Serraphula uysi</i> "            |
| 42, " <i>Chaetocnema sp n 9</i> "           | 42, " <i>Serraphula wittmeri</i> "        |
| 42, " <i>Longitarsus transvaalensis</i> "   |                                           |

DKM-KWN Drakensberg Mountains-KwaZulu-Natal 19

|                                             |                                            |
|---------------------------------------------|--------------------------------------------|
| 45, " <i>Calotheca wanati</i> "             | 45, " <i>Serraphula audisiana</i> "        |
| 45, " <i>Chaetocnema barkeri</i> "          | 45, " <i>Serraphula burlischi</i> "        |
| 45, " <i>Chaetocnema longicornis</i> "      | 45, " <i>Serraphula colonnellii</i> "      |
| 45, " <i>Chaetocnema mariobiondii</i> "     | 45, " <i>Serraphula drakensbergensis</i> " |
| 45, " <i>Chaetocnema sp n 5</i> "           | 45, " <i>Serraphula monticola</i> "        |
| 45, " <i>Chaetocnema sp n 6</i> "           | 45, " <i>Serraphula natalensis</i> "       |
| 45, " <i>Chaetocnema zulu</i> "             | 45, " <i>Serraphula osellai</i> "          |
| 45, " <i>Drakensbergianella rudebecki</i> " | 45, " <i>Serraphula puncticollis</i> "     |
| 45, " <i>Jacobyana sudafricana</i> "        | 45, " <i>Calotheca carolineae</i> "        |
| 45, " <i>Longitarsus grobbelaariae</i> "    |                                            |

49, "*Adamastoraltica humicola*"  
49, "*Calotheca danielssoni*"  
49, "*Calotheca regularis*"  
49, "*Chaetocnema adamastori*"  
49, "*Chaetocnema audisiana*"  
49, "*Chaetocnema chalcea*"  
49, "*Chaetocnema convexicollis*"  
49, "*Chaetocnema saldanhai*"  
49, "*Chaetocnema sp n 1*"  
49, "*Chaetocnema tablensis*"  
49, "*Chirodica cedarbergensis*"  
49, "*Chirodica chalcopetra unicolor*"  
49, "*Chirodica fulvipes*"  
49, "*Chirodica similfulva*"  
49, "*Longitarsus afro meridionalis*"  
49, "*Longitarsus capensis*"

49, "*Longitarsus cedarbergensis*"  
49, "*Longitarsus debiasei*"  
49, "*Longitarsus hexrivierbergensis*"  
49, "*Longitarsus luctuosus*"  
49, "*Longitarsus lugubris*"  
49, "*Longitarsus malherbei*"  
49, "*Longitarsus melanicus*"  
49, "*Longitarsus neseri*"  
49, "*Longitarsus piketbergensis*"  
49, "*Longitarsus rouxi*"  
49, "*Longitarsus sudafricanus*"  
49, "*Stegnaspea audisiana*"  
49, "*Stegnaspea danielssoni*"  
49, "*Stegnaspea debiasei*"  
49, "*Stegnaspea endroedyi*"  
49, "*Stegnaspea penrithae*"
